# Supplementary material
Source: PubMed Central journal article supplement (PMC4135492)

## Online Supplemental Material

### **Supplemental Figure 1**

Serum non-transferrin-bound iron increase in individuals over 8 hours after consumption of a test meal with 6 mg iron with meal, 60 mg iron with meal and 60 mg iron without meal. The first row shows the study group with serum ferritin  $\geq 25$   $\mu\text{g/L}$  and the second row shows the study group with serum ferritin  $< 25$   $\mu\text{g/L}$ .

Serum ferritin  $\leq 25$   $\mu\text{g/L}$

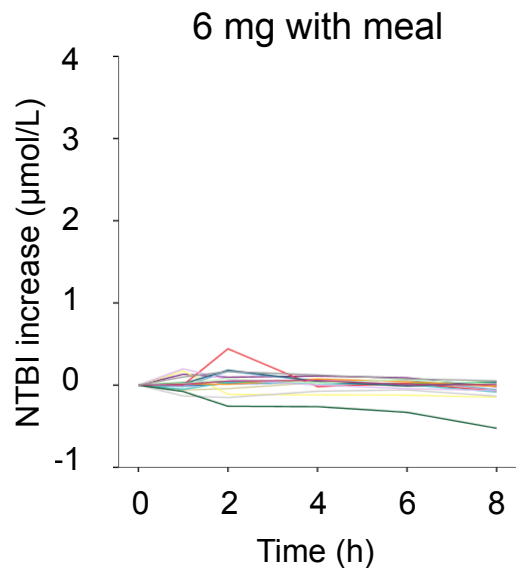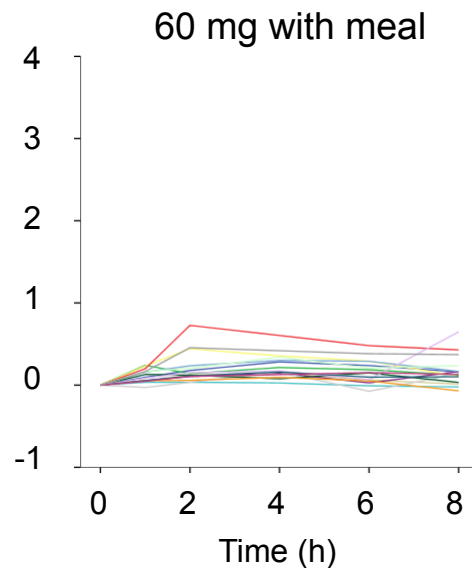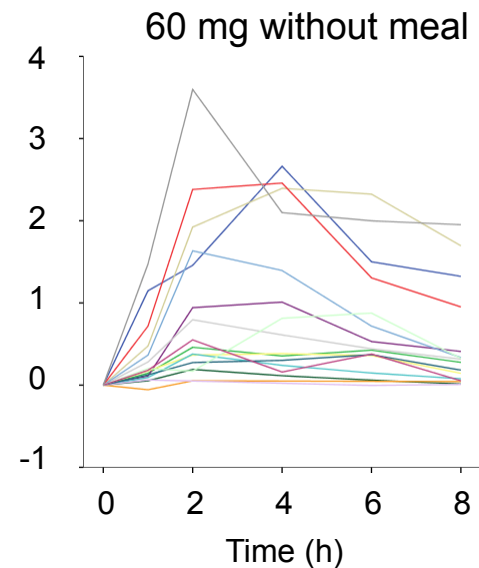

Serum ferritin  $> 25$   $\mu\text{g/L}$

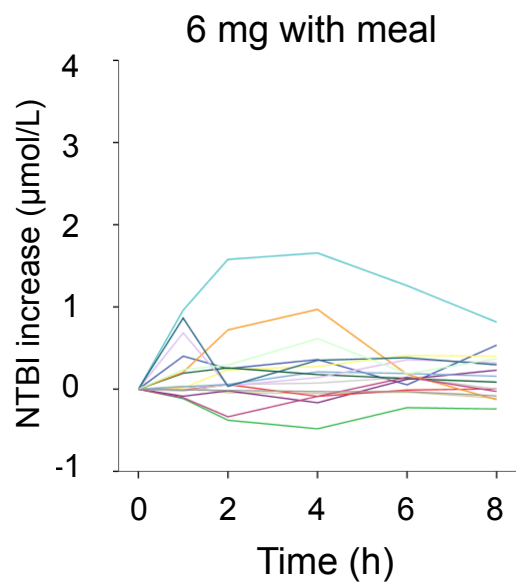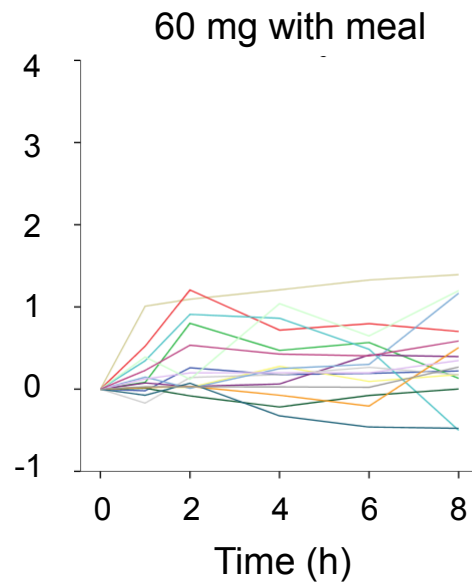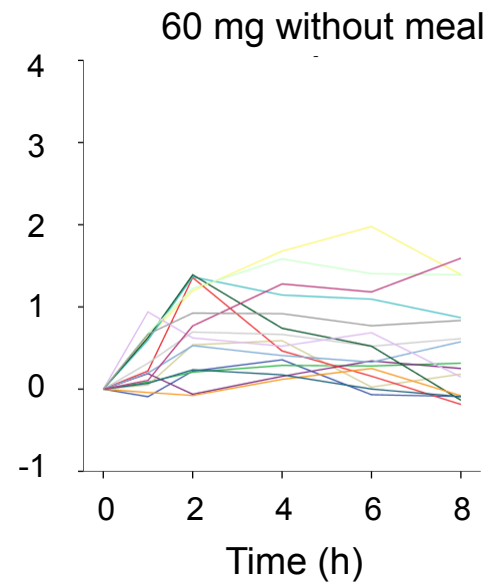

Supplement: 113.081505_ajcn081505SupplementaryData1.pdf [file 113.081505_ajcn081505SupplementaryData1.pdf]
